# Supplementary material for: Interstrain differences in the expression and activity of Cyp2a5 in the mouse liver
Source: PubMed Central journal article supplement (PMC5353797; doi:10.1186/s13104-017-2435-x), 2017-03-15
Supplement: 13104_2017_2435_MOESM1_ESM.pdf [file 13104_2017_2435_MOESM1_ESM.pdf]

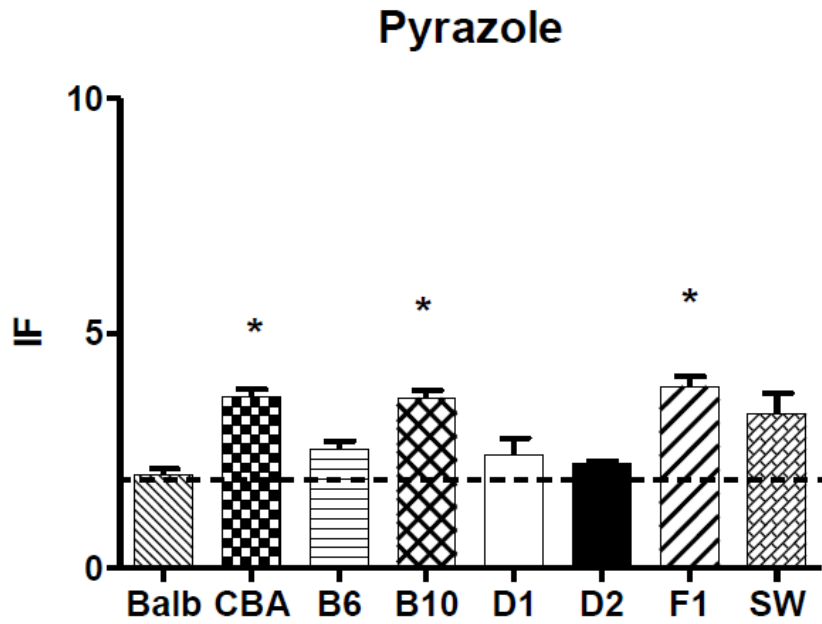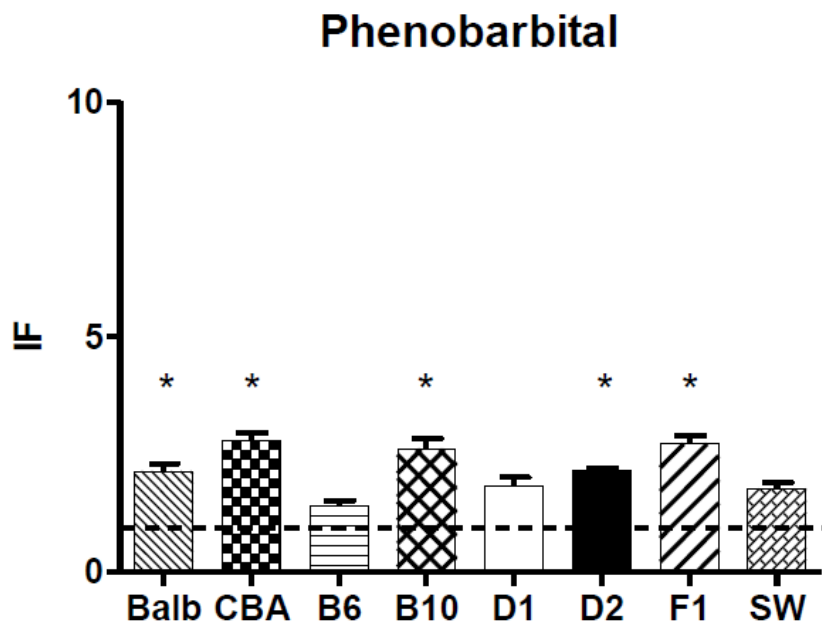

**Additional file 1.** Induced Coumarin-7-hydroxylase activities in liver microsomes of different strains of mice. (upper panel) Induced activities: Induction factor (IF, ratio of induced to average constitutive activity) after treatment with pyrazole (100 mg/kg body weight/day x 3 days, i.p.) and (lower panel) Induced activities: Induction factor (IF, ratio of induced to average constitutive activity) after treatment with phenobarbital (80 mg/kg body weight/day x 3 days, i.p.). \* differs from B6 ( $P < 0.05$ , Kruskal-Wallis test followed by Mann-Whitney U test with Bonferroni's correction).
