# Supplementary material for: Interstrain differences in the expression and activity of Cyp2a5 in the mouse liver
Source: PubMed Central journal article supplement (PMC5353797; doi:10.1186/s13104-017-2435-x), 2017-03-15
Supplement: 13104_2017_2435_MOESM4_ESM.pdf [file 13104_2017_2435_MOESM4_ESM.pdf]

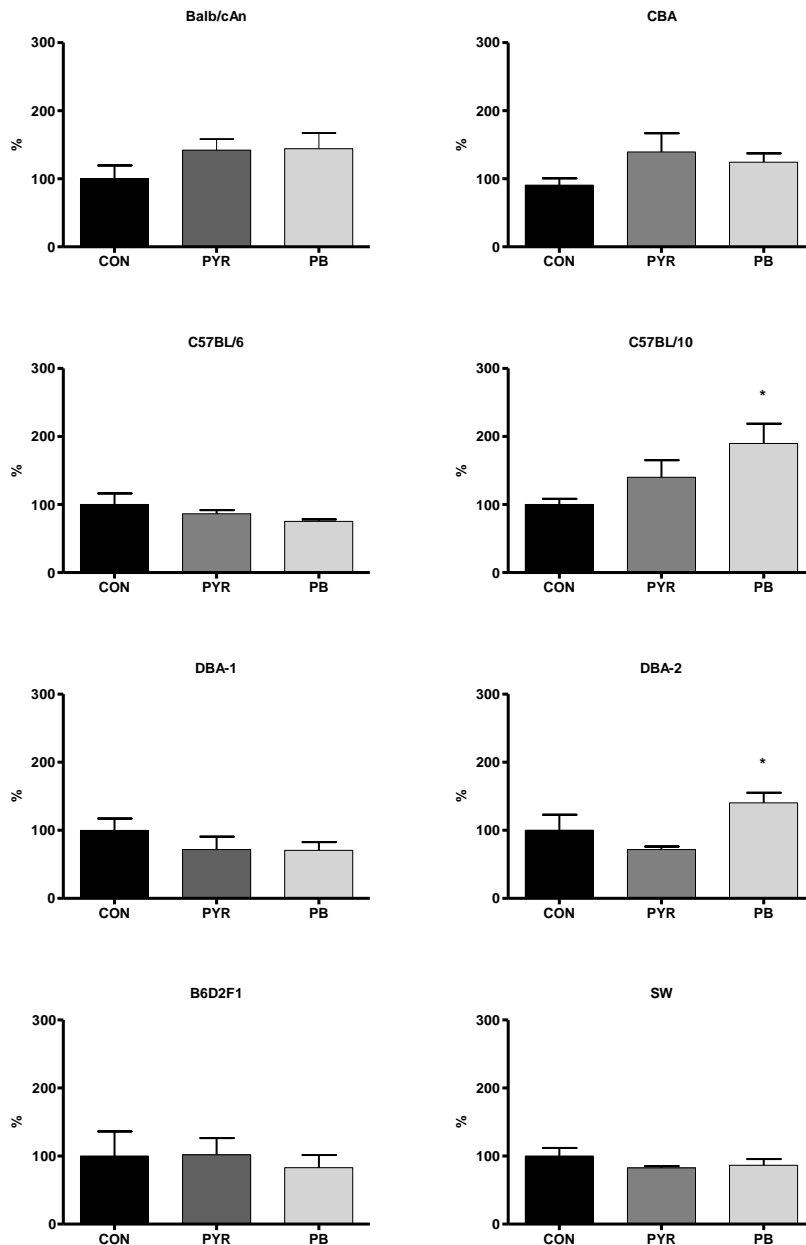

**Additional file 4.** Serum transaminase levels in different strains of mice. Serum AST levels in sera of non-treated, pyrazole- (100 mg/kg body weight/day x 3 days, i.p.) and phenobarbital- (80 mg/kg body weight/day x 3 days, i.p.) treated Balb, CBA, B6, B10, D1, D2, F1 and SW mice. Levels (IU/L) are expressed as ratio of induced to average constitutive levels (100%). \*: levels are different from those of vehicle controls of the same strain ( $P < 0.05$ , Kruskal Wallis test followed by Mann-Whitney U test).
